# Supplementary material for: Graphene Enhances Actin Filament Assembly Kinetics and Modulates NIH-3T3 Fibroblast Cell Spreading
Source: Int J Mol Sci. 2022 Jan 3;23(1):509. doi: 10.3390/ijms23010509 (PMC8745492; doi:10.3390/ijms23010509)
Supplement: Supplementary file 1 [file ijms-23-00509-s001.zip]

Archive with 9 entries (9 files):
- ijms-1492338-Supplementary-Final.pdf
- S1 control.avi
- S2 0.5ugmL graphene flakes.avi
- S3 1ugmL graphene flakes.avi
- S4 2.5ugmL graphene flakes.avi
- S5 5ugmL graphene flakes.avi
- S6 10ugmL graphene flakes.avi
- S7 20ugmL graphene flakes.avi
- S8 graphene surface.avi
